# Supplementary material
Source: bioRxiv or medRxiv preprint supplement (https://medrxiv.org/highwire/filestream/95511/field_highwire_adjunct_files/0/2020.07.15.20154518-1.pdf)

# Figure S1

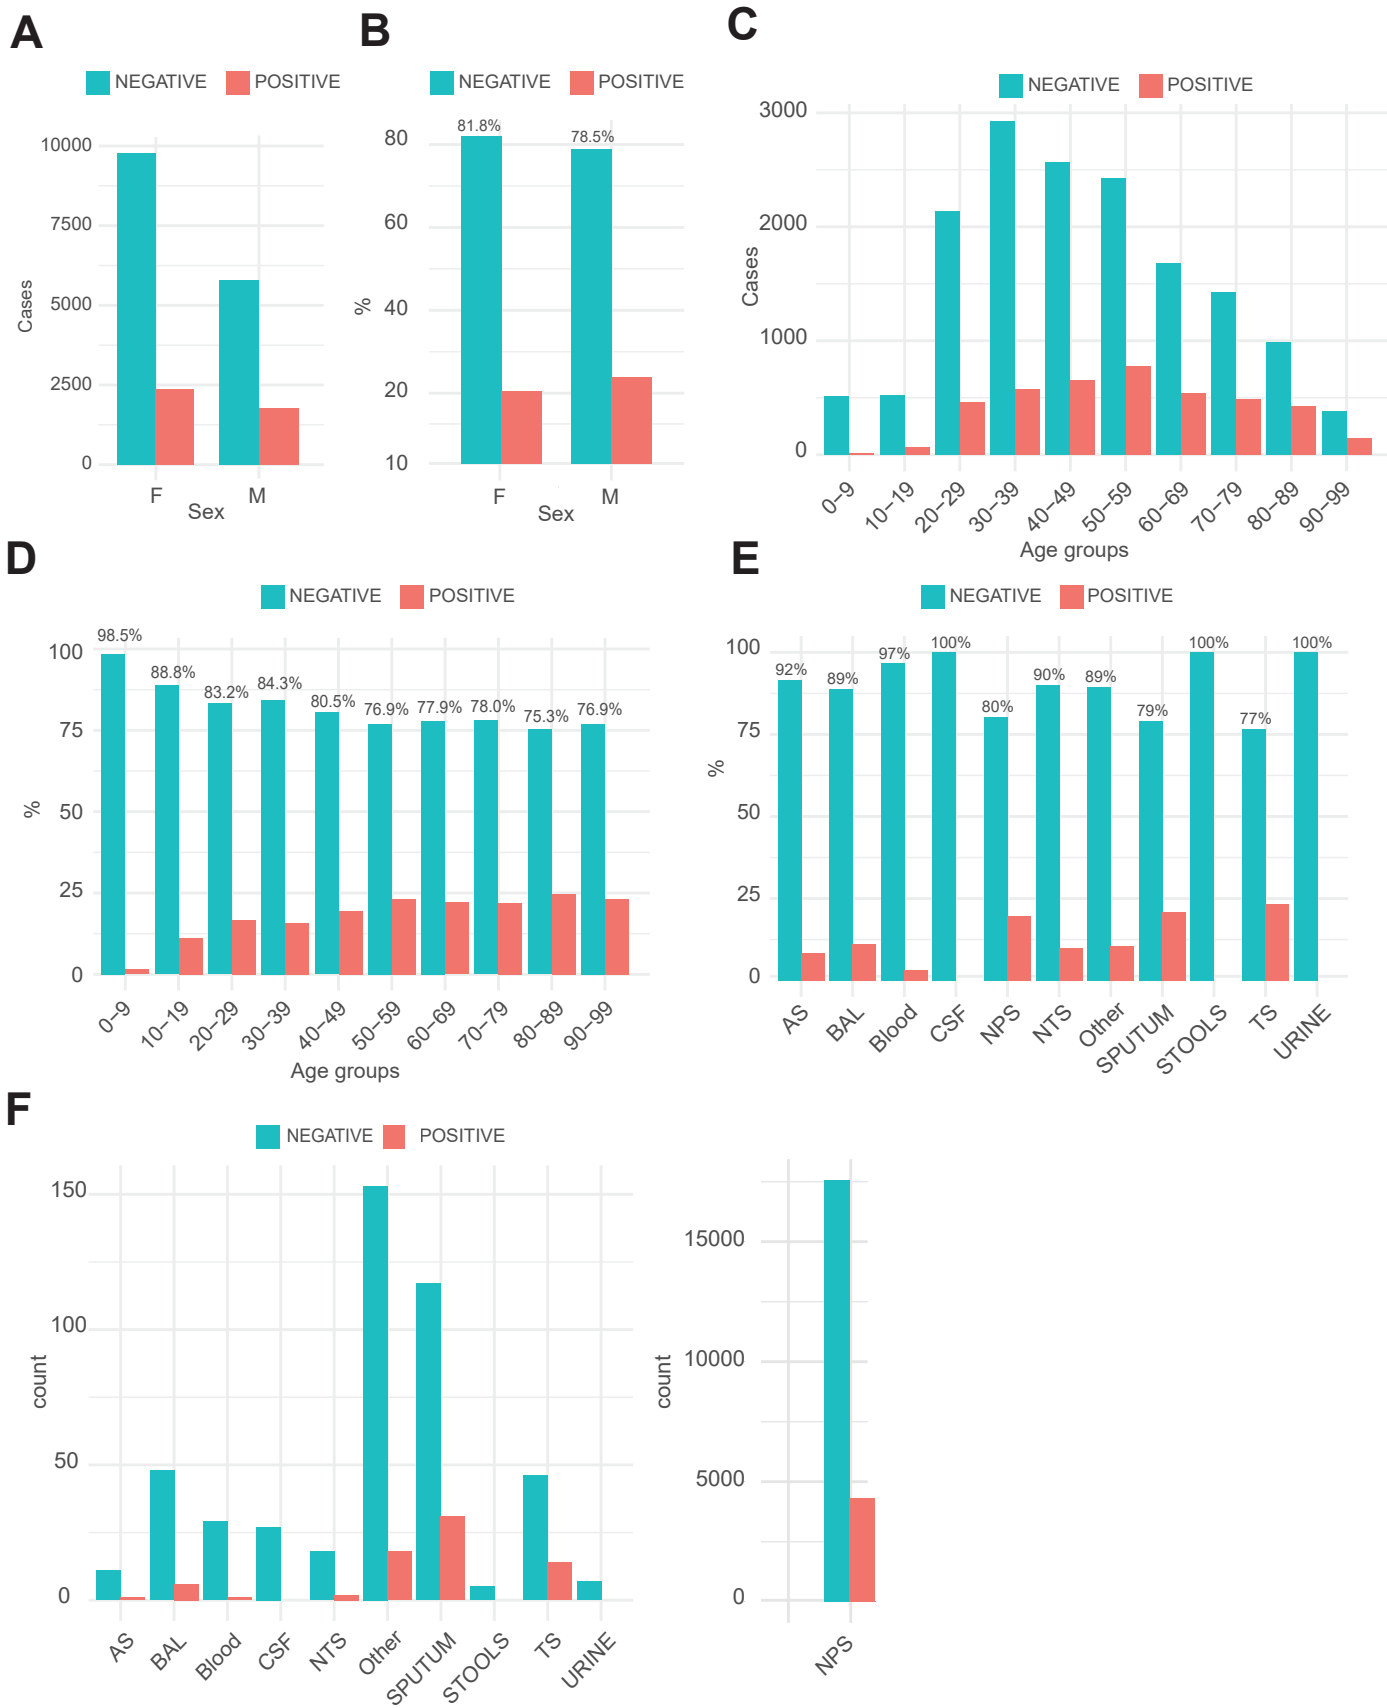

Supplement: Supplementary file [file 2020.07.15.20154518-1.pdf]
